# Supplementary material for: Docosane-Organosilica Microcapsules for Structural Composites with Thermal Energy Storage/Release Capability
Source: PubMed Central journal article supplement (PMC6514850; doi:10.3390/ma12081286), 2019-04-19
Supplement: materials-12-01286-s001.pdf [file materials-12-01286-s001.pdf]

1 *Supplementary materials*

2 **Docosane-organosilica microcapsules for structural**  
3 **composites with thermal energy storage/release**  
4 **capability**

5 **Giulia Fredi <sup>1,\*</sup>, Sandra Dirè <sup>1,2,\*</sup>, Emanuela Callone <sup>1,2</sup>, Riccardo Ceccato <sup>1</sup>, Francesco Mondadori <sup>1</sup>**  
6 **and Alessandro Pegoretti <sup>1,\*</sup>**

7 <sup>1</sup> Department of Industrial Engineering and INSTM research unit, University of Trento, Via Sommarive 9,  
8 38123 Trento, Italy; emanuela.callone@unitn.it (E.C.); riccardo.ceccato@unitn.it (R.C.);  
9 francesco.mondadori93@gmail.com (F.M.)

10 <sup>2</sup> “Klaus Müller” Magnetic Resonance Lab., Department of Industrial Engineering, University of Trento, via  
11 Sommarive 9, 38123 Trento, Italy

12 \* Correspondence: giulia.fredi@unitn.it (G.F.); sandra.dire@unitn.it (S.D.); alessandro.pegoretti@unitn.it  
13 (A.P.)

14 Received: 25 March 2019; Accepted: 17 April 2019; Published: date

15 **Supplementary materials**

16

17 **1. Solid state NMR**

18 *1.1 Experimental parameters*

19 <sup>13</sup>C proton-decoupled MAS spectra were acquired under the following conditions: <sup>13</sup>C frequency:  
20 100.48 MHz,  $\pi/4$  pulse: 2.5  $\mu$ s, decoupling length: 5.9  $\mu$ s, recycle delay: 10 s, 300 scans. Samples were  
21 packed in 4 mm zirconia rotor and spun at 8 kHz under air flow. Adamantane and Q8M8 were used  
22 as external secondary references.

23 <sup>13</sup>C spin-lattice relaxation times (T<sub>1c</sub>) were measured at room temperature with a CP Inversion  
24 Recovery Experiment [1] with  $\tau$  from 1 ms to 30 s and using the already reported CP MAS  
25 parameters. The decay curves were fitted with the nonlinear least-square method. The T<sub>1c</sub> constant  
26 represents the rate needed by the z-component of net magnetization vector (represented by the NMR  
27 signal intensity) to go back exponentially to the equilibrium state aligned to the external magnetic  
28 field. The process depends on the interaction between the spin system and the close environment.  
29 Crystallinity and molecular mobility, together with the closeness to paramagnetic centers or unpaired  
30 electrons, strongly affect the relaxation mechanism generally described by the Bloch equation [2].

31

## 32 1.2 Results

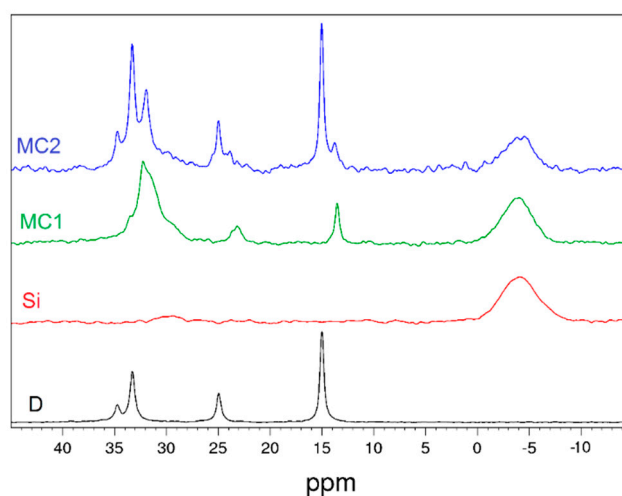

33

34

35 **Figure S1.**  $^{13}\text{C}$  proton-decoupled MAS NMR spectra of docosane (D), MC1 and MC2 microcapsules  
 36 and the neat organosilica microparticles (Si).

37

38 In order to save experimental time, the quantitative analysis can be run considering only the Si-  
 39  $\text{CH}_3$  and the docosane  $\alpha$ -carbons because the recycle time used is not enough to permit the complete  
 40 relaxation of all the carbon magnetizations. This can be clearly deduced from the relative areas of the  
 41 C signals in the D spectrum. This is still true for MC2 sample, but no longer for MC1 sample where  
 42 the  $\text{CH}_2/\text{CH}_3$  area ratio equal to 9.5 represents correctly the docosane carbon atom distribution. This  
 43 is a rough indication that the inclusion in small capsules causes a reduction of the  $T_{1c}$  of the  
 44 methylenes of the docosane through interaction with the organosilica shell. Subsequently, in order to  
 45 quantify this reduction, the relaxation experiments have been done. The mechanism to recover the  
 46 equilibrium  $M(t) - M(0)$  is represented by an exponential decay characteristic of every C in its own  
 47 functional group. The decay curves of all the carbon signals in MC1 and MC2 spectra are reported in  
 48 Figure SM2. It is clear that the confinement leads to an acceleration of the process for all the methylene  
 49 carbons, whereas the methyls from both docosane and MTES are insensitive.

50

51 The relative  $T_{1c}$  constants are reported in Table SM1.

52

53

**Table S1.**  $T_{1c}$  relaxation times of the two samples expressed in sec.

| C type            | MC1  | MC2   |
|-------------------|------|-------|
| $\gamma$          | 61.6 | 117.0 |
| $\epsilon$        | 61.5 | 109.6 |
| $\delta$          | 36.5 | 44.3  |
| $\beta$           | -    | 33.7  |
| $\beta'$          | 2.1  | 4.1   |
| $\alpha$          | -    | 1.6   |
| $\alpha'$         | 1.3  | 1.2   |
| Si- $\text{CH}_3$ | 5.0  | 4.6   |

54

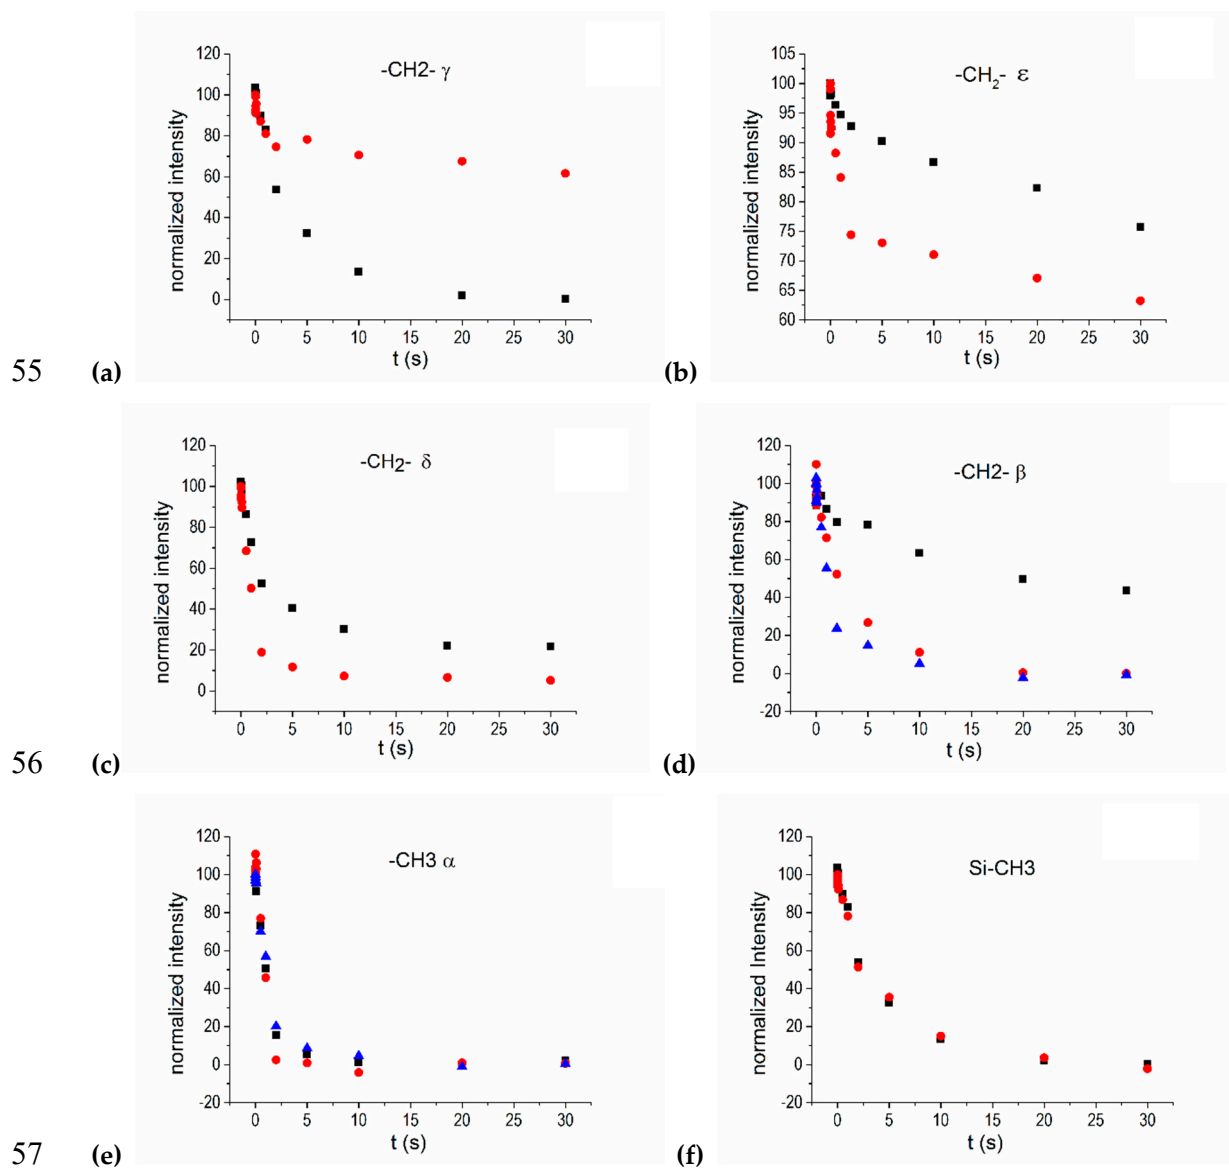

58 **Figure S2.** T1c curves of the carbons detected in the  $^{13}\text{C}$  CP MAS spectra for MC2 (black for original  
 59 signals, blue spots for interfacial peaks) and MC1 samples (red spots): (a)+ (b)+ (c) chain methylenes  
 60 from C-3, (d) C-2 methylenes, (e) methyls, (f) MTES methyls.

61

## 62 2. DSC and TGA analyses on the microcapsules

63

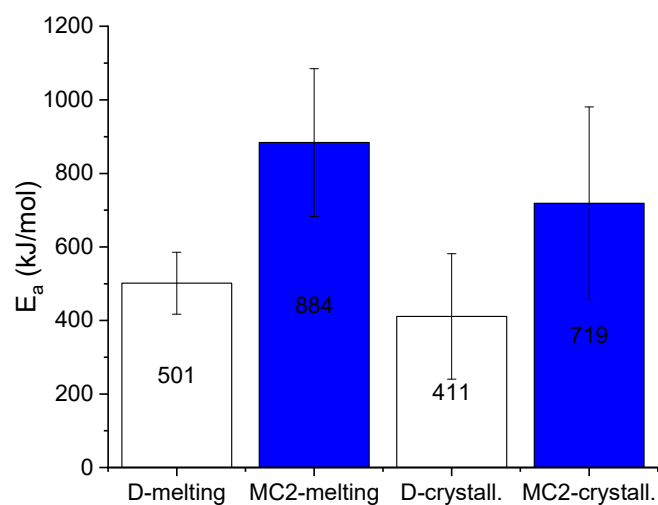

64

65 **Figure S3.** Activation energy for the melting and crystallization processes calculated through the  
 66 Arrhenius equation (slope of the linear regression).

67

68

69

70

**Table S2.** Main results of the TGA tests on the bulk (D) and microencapsulated (MC1 and MC2) docosane and the neat organosilica microparticles (Si).

| Sample     | $T_{1\%}$ (°C) | $T_{3\%}$ (°C) | $T_{5\%}$ (°C) | $T_p^D$ (°C) | $T_p^{Si}$ (°C) | $\omega_D^{TGA}$ (%) | $R_{700^\circ C}$ (%) |
|------------|----------------|----------------|----------------|--------------|-----------------|----------------------|-----------------------|
| <b>D</b>   | 179.8          | 203.5          | 214.8          | 291          | -               | 100                  | -                     |
| <b>MC1</b> | 175.3          | 212.8          | 227.0          | 278          | 572             | 26                   | 30                    |
| <b>MC2</b> | 156.2          | 184.0          | 195.5          | 255          | 547             | 65                   | 10                    |
| <b>Si</b>  | 421.8          | 479.3          | 498.7          | -            | 563             | -                    | 26                    |

71

72

73

74

$T_{1\%}$ ,  $T_{3\%}$ ,  $T_{5\%}$  = temperatures corresponding to a mass loss of 1 wt%, 3 wt% and 5 wt%;  $T_p^D$  = peak temperature of the mass loss derivative, at the degradation of the docosane phase;  $T_p^{Si}$  = peak temperature of the mass loss derivative, at the degradation of the organosilica phase;  $\omega_D^{TGA}$  = weight fraction of docosane;  $R_{700^\circ C}$  = residual mass after the test.

75

## 76 3. DSC, TGA and DMA analyses on the epoxy-based matrices and laminates

77

78

79

80

Table S3. Main results of the DSC tests on the samples EP-MC2 and EP-MC2-CF. The table reports data of the phase change temperatures and enthalpies, as well as the experimental mass fractions of docosane and MC2.

| Sample    | $T_m$ (°C) | $T_c$ (°C) | $\Delta H_m$ (J/g) | $\Delta H_c$ (J/g) | $\omega_D^{DSC}$ (wt%) | $\omega_{MC2}^{DSC}$ (wt%) |
|-----------|------------|------------|--------------------|--------------------|------------------------|----------------------------|
| EP-MC2    | 45.3       | 29.7       | 14.3               | 14.6               | 6.2                    | 10.2                       |
| EP-MC2-CF | 45.0       | 35.3       | 9.3                | 9.6                | 4.1                    | 6.7                        |

81

82

83

$T_m$ ,  $T_c$  = melting and crystallization temperatures of the PCM;  $\Delta H_m$ ,  $\Delta H_c$  = melting and crystallization temperatures of the PCM;  $\omega_D^{DSC}$  (wt%) = experimental mass fraction of docosane;  $\omega_{MC2}^{DSC}$  (wt%) = experimental mass fraction of microcapsules MC2

84

85

86

87

Table S4. Main results of the TGA tests on the matrices EP and EP-MC2, and on the laminates EP-CF and EP-MC2-CF.

| Sample    | $T_{1\%}$ (°C) | $T_{3\%}$ (°C) | $T_{5\%}$ (°C) | $T_p^D$ (°C) | $T_p^{EP}$ (°C) |
|-----------|----------------|----------------|----------------|--------------|-----------------|
| EP        | 184.7          | 281.5          | 327.2          | -            | 368.7           |
| EP-MC2    | 156.8          | 192.8          | 208.5          | 210.2        | 378.2           |
| EP-CF     | 244.3          | 345.3          | 363.3          | -            | 385.4           |
| EP-MC2-CF | 190.2          | 226.3          | 295.5          | 210.1        | 387.2           |

88

89

90

$T_{1\%}$ ,  $T_{3\%}$ ,  $T_{5\%}$  = temperatures corresponding to a mass loss of 1 wt%, 3 wt% and 5 wt%;  $T_p^D$  = peak temperature of the mass loss derivative at the degradation of the docosane phase;  $T_p^{EP}$  = peak temperature of the mass loss derivative at the degradation of the epoxy phase.

91

92

93

Table S5. Main results of the DMA tests on the laminates EP-CF and EP-MC2-CF.

| Sample    | $E'_{60^\circ C}/E'_{0^\circ C}$ (%) | $E'_{120^\circ C}/E'_{0^\circ C}$ (%) | $T_{p,E''}$ (°C) | $T_{p,tan\delta}$ (°C) |
|-----------|--------------------------------------|---------------------------------------|------------------|------------------------|
| EP-CF     | 95.5                                 | 19.9                                  | 92.2             | 94.9                   |
| EP-MC2-CF | 84.3                                 | 5.2                                   | 92.4             | 96.8                   |

94

95

$E'_{60^\circ C}/E'_{0^\circ C}$  and  $E'_{120^\circ C}/E'_{0^\circ C}$  = ratio between  $E'$  values at the indicated temperatures;  $T_{p,E''}$  = peak temperature of  $E''$ ;  $T_{p,tan\delta}$  = peak temperature of  $\tan\delta$ .

96

## 97 References

98

99

100

101

102

1. Alamo, R. G.; Blanco, J. A.; Carrilero, I.; Fu, R. Measurement of the  $^{13}C$  spin-lattice relaxation time of the non-crystalline regions of semicrystalline polymers by a CP MAS-based method. *Polymer*, **2002**, 43(6), 1857-1865.
2. Bloch, F. Nuclear Induction, *Physical Review* **1946**, 70, 4604-73.
